# Supplementary material for: Low dose aspirin and pregnancy: how important is aspirin resistance?
Source: PubMed Central journal article supplement — BJOG. 2016 Mar 1;123(9):1481–7. doi: 10.1111/1471-0528.13914 (PMC5069612; doi:10.1111/1471-0528.13914), 2016-03-01
Supplement: BJO-123-1481-s002.pdf [file BJO-123-1481-s002.pdf]

**Table S2.** Clinical evaluation of aspirin resistance

| <b>Authors</b>                        | <b>Speciality</b> | <b>Study Design</b>               | <b>Assay</b>                            | <b>No. Participants</b>            | <b>Clinical outcomes reported</b>                                                                                                                                       |
|---------------------------------------|-------------------|-----------------------------------|-----------------------------------------|------------------------------------|-------------------------------------------------------------------------------------------------------------------------------------------------------------------------|
| Chu J et al 2010 <sup>1</sup>         | Cardiology        | Prospective dose escalation study | VerifyNow Aspirin Test                  | 314                                | Acute MI (index admission), major adverse cardiac events including cardiovascular death or recurrent ACS requiring hospitalization within 6 months.                     |
| Poulsen T et al 2007 <sup>2</sup>     | Cardiology        | Prospective cohort study          | PFA-100 Collagen/Epinephrine cartridges | 277                                | Acute MI at index admission.                                                                                                                                            |
| Cotter G et al 2004 <sup>3</sup>      | Cardiology        | Prospective cohort Study          | Plasma Thromboxane B2                   | 73                                 | Cardiovascular events, including death, reinfarction, and readmission for unstable angina, and cardiovascular readmission.                                              |
| Glauser J et al 2010 <sup>4</sup>     | Cardiology        | Prospective cohort study          | VerifyNow Aspirin Test                  | 200                                | Composite end point; 30-day revisit, positive cardiac catheterization, or hospital length of stay longer than 3 days                                                    |
| Chen W et al 2007 <sup>5</sup>        | Cardiology        | Prospective cohort study          | VerifyNow Aspirin Test                  | 468                                | Composite of cardiovascular death, myocardial infarction (MI), unstable angina requiring hospitalization, stroke, and transient ischemic attack.                        |
| Hobikoglu G et al 2007 <sup>6</sup>   | Cardiology        | Prospective cohort Study          | PFA-100 Collagen/Epinephrine Cartridges | 140                                | Composite of death, myocardial infarction, cerebrovascular accident and revascularization.                                                                              |
| Cao J et al 2012 <sup>7</sup>         | Cardiology        | Prospective cohort study          | LTA, TEG                                | 269                                | Composite of death, myocardial infarction, unstable angina, stroke and transient ischemic attack.                                                                       |
| Christiaens L et al 2008 <sup>8</sup> | Cardiology        | Prospective cohort study          | PFA-100 Collagen/Epinephrine cartridges | 97                                 | Composite of death, myocardial infarction, and ischemic cerebral infarction or acute limb ischemia.                                                                     |
| Poulsen T et al 2007 <sup>9</sup>     | Cardiology        | Prospective cohort study          | PFA-100 Collagen/Epinephrine cartridges | 187                                | Death, admission with recurrent MI, stroke or mechanical revascularization of atherothrombotic disease.                                                                 |
| Eikelboom J et al 2002 <sup>10</sup>  | Cardiology        | Nested case-control study         | Urinary 11-Dehydrothromboxane B2        | 976 total (including 488 controls) | Composite outcome of MI, stroke, or cardiovascular death.                                                                                                               |
| Addad F et al 2010 <sup>11</sup>      | Cardiology        | Prospective cohort study          | PFA-100 Collagen/Epinephrine cartridges | 204                                | Major Cardiac Adverse Events: cardiovascular death, MI, stroke or TIA. The secondary endpoint was the occurrence of Recurrent Acute Vascular Event; MI, stroke or TIA). |
| Pamukcu B et al 2006 <sup>12</sup>    | Cardiology        | Prospective cohort study          | PFA-100 Collagen/Epinephrine cartridges | 105                                | MI, unstable Angina, Cardiac Death                                                                                                                                      |

|                                         |                      |                                   |                                         |                           |                                                                                                                                             |
|-----------------------------------------|----------------------|-----------------------------------|-----------------------------------------|---------------------------|---------------------------------------------------------------------------------------------------------------------------------------------|
| Andersen K et al 2002 <sup>13</sup>     | Cardiology           | Randomised comparative study      | PFA-100 Collagen/Epinephrine cartridges | 71 (taking aspirin alone) | Non-fatal reinfarction/MI and stroke, secondary endpoint of need for revascularizations (CABG or percutaneous coronary intervention (PCI)). |
| Gum P et al 2003 <sup>14</sup>          | Cardiology           | Prospective cohort study          | LTA                                     | 326                       | Composite of death, MI, or cerebrovascular accident.                                                                                        |
| Sullivan M et al 1993 <sup>15</sup>     | High-risk obstetrics | Prospective cohort study          | LTA                                     | 6                         | Pre-eclampsia                                                                                                                               |
| Rey et al 2011 <sup>16</sup>            | High-risk obstetrics | Retrospective cohort study        | PFA-100 Collagen/Epinephrine cartridges | 270                       | Pre-eclampsia, early-onset pre-eclampsia, severe pre-eclampsia                                                                              |
| Wojtowicz A et al 2011 <sup>17</sup>    | High-risk obstetrics | Prospective cohort study          | Urinary 11-dehydrothromboxane B2        | 43 (taking aspirin)       | Preterm birth, pre-eclampsia, SGA infants.                                                                                                  |
| Kilickesmez K et al 2013 <sup>18</sup>  | Nephrology           | Prospective Cohort Study          | Multiplate ASPI Test                    | 78                        | Composite of death, MI, unstable angina, or CVA. Secondary end points were the individual events of death, MI, unstable angina, and CVA.    |
| Zheng A et al 2013 <sup>19</sup>        | Stroke Medicine      | Prospective cohort Study          | VerifyNow Aspirin Test                  | 90                        | Clinical stroke severity and infarct size.                                                                                                  |
| Boncoraglio G et al 2009 <sup>20</sup>  | Stroke Medicine      | Prospective cohort study          | PFA-100 Collagen/Epinephrine cartridges | 129                       | Composite of stroke, TIA, myocardial infarction, and cardiovascular death.                                                                  |
| Helgason C et al 1994 <sup>21</sup>     | Stroke Medicine      | Prospective dose escalation study | LTA                                     | 146                       | Cerebral ischaemic events.                                                                                                                  |
| McCabe D et al 2005 <sup>22</sup>       | Stroke Medicine      | Prospective cohort study          | PFA-100 Collagen/Epinephrine cartridges | 103                       | Further stroke or TIA.                                                                                                                      |
| Lai P et al 2012 <sup>23</sup>          | Stroke Medicine      | Prospective cohort study          | PFA-100 Collagen/Epinephrine cartridges | 224                       | National Institutes of Health Stroke Scale and modified Rankin Scale scores                                                                 |
| Berrouschott J et al 2006 <sup>24</sup> | Stroke Medicine      | Prospective dose escalation study | LTA                                     | 291                       | Recurrent stroke.                                                                                                                           |

## References for Table S2

1. Chu JW, Wong CK, Chambers J, Wout JV, Herbison P, Tang EW, et al. Aspirin resistance determined from a bed-side test in patients suspected to have acute coronary syndrome portends a worse 6 months outcome. *QJM: An International Journal of Medicine*. 2010;103(6):405.
2. Poulsen TS, Oslash, Rgensen B, Korsholm L, Bj, Oslash, et al. Prevalence of aspirin resistance in patients with an evolving acute myocardial infarction. *Thrombosis Research*. 2007;119(5):555.

3. Cotter G, Shemesh E, Zehavi M, Dinur I, Rudnick A, Milo O, et al. Lack of aspirin effect: aspirin resistance or resistance to taking aspirin? *American Heart Journal*. 2004;147(2):293.
4. Glauser J, Emerman CL, Bhatt DL, Peacock WF, Glauser J, Emerman CL, et al. Platelet aspirin resistance in ED patients with suspected acute coronary syndrome. *The American Journal of Emergency Medicine*. 2010;28(4):440.
5. Chen W-H, Cheng X, Lee P-Y, Ng W, Kwok JY-Y, Tse H-F, et al. Aspirin Resistance and Adverse Clinical Events in Patients with Coronary Artery Disease. *American Journal of Medicine*. 2007;120(7):631.
6. Hobikoglu GF, Norgaz T, Aksu H, Ozer O, Erturk M, Destegul E, et al. The effect of acetylsalicylic acid resistance on prognosis of patients who have developed acute coronary syndrome during acetylsalicylic acid therapy. *Canadian Journal of Cardiology*. 2007;23(3):201.
7. Cao J, Liu L, Fan L, Chen T, Hu G, Hu Y, et al. The prevalence, risk factors and prognosis of aspirin resistance in elderly male patients with cardiovascular disease. *The Aging Male*. 2012;15(3):140.
8. Christiaens L, Ragot S, Mergy J, Allal J, Macchi L. Major clinical vascular events and aspirin-resistance status as determined by the PFA-100 method among patients with stable coronary artery disease: a prospective study. *Blood Coagulation & Fibrinolysis : An International Journal in Haemostasis and Thrombosis*. 2008;19(3):235.
9. Poulsen TS, Kristensen S, Oslash, Ren R, Korsholm L, Haghfelt T, et al. Variation and importance of aspirin resistance in patients with known cardiovascular disease. *Thrombosis Research*. 2007;120(4):477.
10. Eikelboom JW, Hirsh J, Weitz JI, Johnston M, Yi Q, Yusuf S. Aspirin-resistant thromboxane biosynthesis and the risk of myocardial infarction, stroke, or cardiovascular death in patients at high risk for cardiovascular events. *Circulation*. 2002;105(14):1650-5.
11. Addad F, Chakroun T, Abderazek F, Ben-Farhat M, Hamdi S, Dridi Z, et al. Response variability to aspirin and one-year prediction of vascular events in patients with stable coronary artery disease. *Journal of Thrombosis and Thrombolysis*. 2010;29(1):108.
12. Pamukcu B, Oflaz H, Oncul A, Umman B, Mercanoglu F, Ozcan M, et al. The role of aspirin resistance on outcome in patients with acute coronary syndrome and the effect of clopidogrel therapy in the prevention of major cardiovascular events. *Journal of Thrombosis and Thrombolysis*. 2006;22(2):103.
13. Andersen K, Hurlen M, Arnesen H, Seljeflot I, Oslash, Rg, et al. Aspirin non-responsiveness as measured by PFA-100 in patients with coronary artery disease. *Thrombosis Research*. 2002;108(1):37.

14. Gum PA, Kottke-Marchant K, Welsh PA, White J, Topol EJ. Clinical study: antiplatelet therapy: A prospective, blinded determination of the natural history of aspirin resistance among stable patients with cardiovascular disease. *Journal of the American College of Cardiology*. 2003;41:961-5.
15. Sullivan MHF, Elder MG. Changes in platelet reactivity following aspirin treatment for pre-eclampsia. *BJOG: An International Journal of Obstetrics & Gynaecology*. 1993;100(6):542.
16. Rey E, Rivard G-E. Is testing for aspirin response worthwhile in high-risk pregnancy? *European Journal of Obstetrics and Gynecology*. 2011;157:38-42.
17. Wojtowicz A, Undas A, Huras H, Musial J, Rytlewski K, Reron A, et al. Aspirin resistance may be associated with adverse pregnancy outcomes. *Neuroendocrinology Letters*. 2011;32(3):334-9.
18. Kilickesmez KO, Kocas C, Abaci O, Okcun B, Gurmen T, Gorcin B. Follow-up of aspirin-resistant patients with end-stage kidney disease. *International Urology and Nephrology*. 2012:1-6.
19. Zheng AS, Churilov L, Colley RE, Goh C, Davis SM, Yan B, et al. Association of Aspirin Resistance With Increased Stroke Severity and Infarct Size. *JAMA Neurology*. 2013;70(2):208.
20. Boncoraglio GB, Bodini A, Brambilla C, Corsini E, Carriero MR, Parati EA. Aspirin resistance determined with PFA-100 does not predict new thrombotic events in patients with stable ischemic cerebrovascular disease. *Clinical Neurology and Neurosurgery*. 2009;111(3):270-3.
21. Helgason CM, Bolin KM, Hoff JA, Winkler SR, Mangat A, Tortorice KL, et al. Development of aspirin resistance in persons with previous ischemic stroke. *Stroke*. 1994;25(12):2331.
22. McCabe DJ, Harrison P, Mackie IJ, Sidhu PS, Lawrie AS, Purdy G, et al. Assessment of the antiplatelet effects of low to medium dose aspirin in the early and late phases after ischaemic stroke and TIA. *Platelets*. 2005;16(5):269.
23. Lai P-T, Chen S-Y, Lee Y-S, Ho Y-P, Chiang Y-Y, Hsu H-Y, et al. Relationship between acute stroke outcome, aspirin resistance, and humoral factors. *Journal of the Chinese Medical Association*. 2012;75(10):513.
24. Berrouschot J, Schwetlick B, von Twickel G, Fischer C, Uhlemann H, Siegemund T, et al. Aspirin resistance in secondary stroke prevention. *Acta Neurologica Scandinavica*. 2006;113(1):31-5.
